# Supplementary material for: Histidine-functionalized chitosan–Cu(ii) complex: a novel and green heterogeneous nanocatalyst for two and three component C–S coupling reactions
Source: Royal Society of Chemistry journal article supplement (doi:10.1039/c7nj00595d), 2017-01-01
Supplement: c7nj00595d1.pdf [file c7nj00595d1.pdf]

## Supplementary Information

### **Histidine-functionalized chitosan-Cu (II) complex: a novel and green heterogeneous nanocatalyst for two and three component C—S coupling reactions**

Abdol R. Hajipour<sup>1,2</sup>, Seyed Mostafa Hosseini<sup>1</sup>, Saeideh Jajarmi<sup>1</sup>

<sup>1</sup> *Pharmaceutical Research Laboratory, Department of Chemistry, Isfahan University of Technology, Isfahan 84156, Islamic Republic of Iran*

<sup>2</sup> *Department of Neuroscience, University of Wisconsin, Medical School, Madison, WI53706-1532, USA*

## Spectral Data:

**Benzyl phenyl sulfane (table 3, entries 1 and 2 ):** colorless oil,  $^1\text{H}$  NMR ( $\text{CDCl}_3$ , 300 MHz):  $\delta$  7.05-7.23 (m, 10 H), 4.013 (s, 2 H);  $^{13}\text{C}$  NMR ( $\text{CDCl}_3$ , 75 MHz):  $\delta$  137.51, 136.45, 129.84, 128.90, 128.56, 127.25, 126.39, 39.08.

**benzyl(4-methoxyphenyl)sulfane (table 3, entry 4 ):** white solid.  $^1\text{H}$  NMR (300 MHz,  $\text{CDCl}_3$ )  $\delta$ : 7.13-7.16 (m, 5 H), 7.08-7.11 (m, 2 H), 6.7 (d, 2 H), 3.9 (s, 2 H), 3.66 (s, 3 H);  $^{13}\text{C}$  NMR (75 MHz,  $\text{CDCl}_3$ )  $\delta$ : 159.2, 138.2, 134.1, 128.9, 128.6, 128.4, 127.0, 126.1, 114.5, 55.3, 41.3.

**benzyl(4-nitrophenyl)sulfane (table 3, entries 5 and 6):** white solid.  $^1\text{H}$  NMR (300 MHz,  $\text{CDCl}_3$ )  $\delta$ : 8.01-8.03 (m, 2 H), 7.18-7.32(m, 7 H), 4.17 (s, 2 H);  $^{13}\text{C}$  NMR (75 MHz,  $\text{CDCl}_3$ )  $\delta$ : 147.2, 145.5, 135.5, 128.9, 128.7, 127.8, 1265.7, 123.9, 37.1.

**Diphenylsulfane(Table 4, entries 1 and 2):**  $^1\text{H}$  NMR (300 MHz,  $\text{CDCl}_3$ , TMS):  $\delta$  7.33–7.16 (m, 10H).  $^{13}\text{C}$  NMR (75 MHz,  $\text{CDCl}_3$ , TMS): $\delta$  135.8, 131.1, 129.1, 127.0.

**Bis(2-nitrophenyl)sulfane(Table 4, entries 11 and 12):**  $^1\text{H}$  NMR (300 MHz,  $\text{CDCl}_3$ , TMS): $\delta$  8.11 (d,  $J=8.0$  Hz, 2H), 7.59-7.47 (m, 4H), 7.31 (d,  $J=8.0$  Hz, 2H).  $^{13}\text{C}$  NMR (75 MHz,  $\text{CDCl}_3$ , TMS): $\delta$  149.4, 133.8, 133.7, 131.5, 128.7, 125.5.

**Bis(4-methoxyphenyl)sulfane(Table 4, entry 4):** $^1\text{H}$  NMR (300 MHz,  $\text{CDCl}_3$ , TMS): $\delta$  7.50–7.22 (m, 4H), 6.81 (d, 4H,  $J = 8.60$  Hz), 3.74 (s, 6H).  $^{13}\text{C}$  NMR (75 MHz,  $\text{CDCl}_3$ , TMS): $\delta$  159.0, 132.7, 114.6, 114.5, 55.2.
